# Supplementary material for: Pectin and Zinc Alginate: The Right Inner/Outer Polymer Combination for Core-Shell Drug Delivery Systems
Source: Pharmaceutics. 2020 Jan 21;12(2):87. doi: 10.3390/pharmaceutics12020087 (PMC7076462; doi:10.3390/pharmaceutics12020087)
Supplement: Supplementary file 1 [file pharmaceutics-12-00087-s001.pdf]

# Pectin and Zinc Alginate: The Right Inner/Outer Polymer Combination for Core-Shell Drug Delivery Systems

Giulia Auriemma, Andrea Cerciello, Rita P. Aquino, Pasquale Del Gaudio, Bruno M. Fusco and Paola Russo

FT-IR studies were conducted in order to verify the presence of interactions between betamethasone and the polymer matrix in the loaded particles. Infrared analysis was performed using a FTIR spectrophotometer (IRAffinity-1S, Shimadzu Corporation, Kyoto, Japan) equipped with a MIRacle ATR accessory with ZnSe crystal plate. The samples were directly charged over the crystal plate and analysed using 256 scans with a  $1\text{ cm}^{-1}$  resolution step. Each experiment was carried out in triplicate, and results averaged.

As shown in Figure S1, betamethasone presented the asymmetric stretching bands of the carboxylate anion between  $1710$  and  $1600\text{ cm}^{-1}$  and the symmetric ones at  $1430\text{ cm}^{-1}$ ; blank pectin particles presented amide bands between  $1680\text{ cm}^{-1}$  and  $1592\text{ cm}^{-1}$  while COO stretching was observed at  $1410\text{ cm}^{-1}$ . Drug loaded particles show the betamethasone asymmetric COO stretching bands shifted at lower wavenumbers (between  $1650$  and  $1600\text{ cm}^{-1}$ ), while symmetric COO stretching probably was covered by polymer matrix bands due to interactions with pectinate amide groups via  $\text{Zn}^{+2}$  coordination.

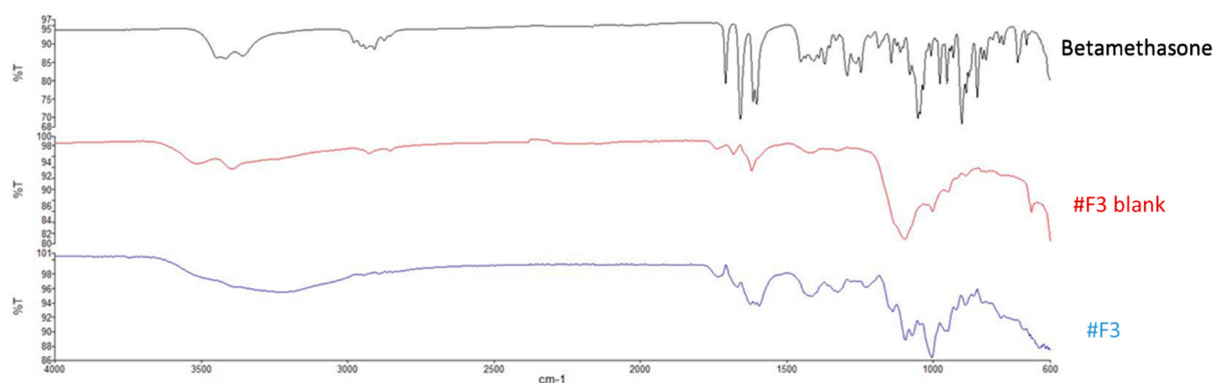

Figure S1. FT-IR spectra of: B raw material, blank F3 and B loaded F3.
